# Supplementary material for: Nucleotide excision repair in Trypanosoma brucei: specialization of transcription-coupled repair due to multigenic transcription
Source: PubMed Central journal article supplement (PMC4138998; doi:10.1111/mmi.12589), 2014-04-24
Supplement: mmi-92-756-sd1.pdf [file mmi-92-756-sd1.pdf]

**Nucleotide excision repair in *Trypanosoma brucei*: specialization of transcription-coupled repair due to multigenic transcription.**

**Carlos R. Machado <sup>1#\*</sup>, João P. Vieira-da-Rocha <sup>1#</sup>, Isabela Mendes <sup>1,3</sup>, Matheus A. Rajão <sup>2</sup>, Lucio Marcello <sup>3</sup>, Mainá Bitar <sup>1</sup>, Marcela G. Drummond <sup>5</sup>, Priscila Grynberg <sup>1</sup>, Denise A. A. Oliveira <sup>5</sup>, Catarina Marques <sup>3</sup>, Ben Van Houten <sup>4</sup>, Richard McCulloch <sup>3\*</sup>**

<sup>1</sup> Departamento de Bioquímica e Imunologia, ICB, Universidade Federal de Minas Gerais, Av. Antônio Carlos, 6627, Caixa Postal 486, Belo Horizonte 30161-970, MG, Brazil.

<sup>2</sup> Coordenação de Pesquisa, Instituto Nacional de Câncer, Rua André Cavalcanti, 37 Fátima 20231-050 - Rio de Janeiro, RJ, Brazil.

<sup>3</sup> The Wellcome Trust Centre for Molecular Parasitology, College of Medical, Veterinary and Life Sciences, Institute of Infection, Immunity and Inflammation, University of Glasgow, Sir Graeme Davies Building, 120 University Place, Glasgow, G12 8TA, UK.

<sup>4</sup> Department of Pharmacology and Chemical Biology, University of Pittsburgh School of Medicine and The University of Pittsburgh Cancer Institute, Hillman Cancer Center, Pittsburgh, PA 15213, USA.

<sup>5</sup> Laboratório de Genética Animal, Escola de Veterinária, Universidade Federal de Minas Gerais, Av. Antônio Carlos, 6627, Caixa Postal 486, Belo Horizonte 30161-970, MG, Brazil.

#These authors contributed equally to this work.

\* Corresponding authors: richard.mcculloch@glasgow.ac.uk; FAX: +44(0)141 330 8269 and crmachad@icb.ufmg.br; FAX: (5531) 3409-2984

## Supporting Figure legends

**Supporting figure 1: *T. brucei* XPC.** The upper diagram shows predicted conserved domains in TbXPC when the polypeptide is used to interrogate the proteins in the NCBI database by BLASTp analysis. The lower diagram shows a sequence alignment of TbXPC with related proteins from other eukaryotes; residues identical or conserved in >50% of sequences are shaded black or grey, respectively.

**Supporting figure 2: *T. brucei* RAD23.** The upper diagram shows predicted conserved domains in TbRAD23 when the polypeptide is used to interrogate the proteins in the NCBI database by BLASTp analysis. The lower diagram shows a sequence alignment of TbRAD23 with related proteins from other eukaryotes; residues identical or conserved in >50% of sequences are shaded black or grey, respectively.

**Supporting figure 3: *T. brucei* DDB.** A sequence alignment of TbDDB (only the larger DDB subunit could be identified) with related proteins from other eukaryotes; residues identical or conserved in >50% of sequences are shaded black or grey, respectively.

**Supporting figure 4: *T. brucei* CSB.** The upper diagram shows predicted conserved domains in TbCSB when the polypeptide is used to interrogate the proteins in the NCBI database by BLASTp analysis. The lower diagram shows a sequence alignment of TbCSB with related proteins from other eukaryotes; residues identical or conserved in >50% of sequences are shaded black or grey, respectively.

**Supporting figure 5: *T. brucei* XPD.** The upper diagram shows predicted conserved domains in TbXPD when the polypeptide is used to interrogate the proteins in the NCBI database by BLASTp analysis. The lower diagram shows a sequence alignment of TbXPD with related proteins from other eukaryotes; residues identical or conserved in >50% of sequences are shaded black or grey, respectively.

**Supporting figure 6: *T. brucei* XPB homologues.** The upper diagrams shows predicted conserved domains in TbXPB and TbXPBz when the polypeptides are used to interrogate the proteins in the NCBI database by BLASTp analysis. The lower diagram shows a neighbor-joining tree of the two *T. brucei* XPB homologues with related proteins from other eukaryotes and from an archaea.

**Supporting figure 7: *T. brucei* XPG.** The upper diagram shows predicted conserved domains in TbXPG when the polypeptide is used to interrogate the proteins in the NCBI database by BLASTp analysis. The middle diagram shows a summary of the comparative sizes and predicted conserved domains in XPG from *T. brucei* and from *H. sapiens*. The lower diagram shows a sequence alignment of TbXPG with related proteins from other eukaryotes; residues identical or conserved in >50% of sequences are shaded black or grey, respectively.

**Supporting figure 8: *T. brucei* XPF.** The upper diagram shows predicted conserved domains in TbXPF when the polypeptide is used to interrogate the proteins in the NCBI database by BLASTp analysis. The lower diagram shows a sequence alignment of TbXPF with related proteins from other eukaryotes; residues identical or conserved in >50% of sequences are shaded black or grey, respectively.

**Supporting figure 9: *T. brucei* ERCC1.** A sequence alignment is shown of TbERCC1 with related proteins from other eukaryotes; residues identical or conserved in >50% of sequences are shaded black or grey, respectively.

**Supporting figure 10: TbCSB depletion increases UV-resistance for a short period post-irradiation.** Survival curve of TbCSB depleted cell line and its uninduced control, 4 hours after treatment with 1500 J/m<sup>2</sup> of UVC. Percent survival was calculated as the relative percentage of cells present in the treated groups compared with the untreated control. Values are means of three experiments, and vertical lines denote standard deviation.

**Table S1: Primers used in RNAi construct production and mRNA level quantification.**

| Primer     | Sequence                                           |
|------------|----------------------------------------------------|
| XPBrnai_F  | GGGGACAAGTTTGTACAAAAAAGCAGGCTAGCCACTGTTAAGAAGCGGA  |
| XPBrnai_R  | GGGGACCACTTTGTACAAGAAAGCTGGGTCTCCACTCGAGCAAGGAAAC  |
| XPBzrna_F  | GGGGACAAGTTTGTACAAAAAAGCAGGCTACCGACGCTTGGTTTTACAC  |
| XPBzrna_R  | GGGGACCACTTTGTACAAGAAAGCTGGGTGCCTACTAACCTTTGCAGCG  |
| XPCrna_F   | GGGGACAAGTTTGTACAAAAAAGCAGGCTCCTTGTGGGTAACCGCTAA   |
| XPCrna_R   | GGGGACCACTTTGTACAAGAAAGCTGGGTGCGCCACAGAAAAGGTGTAT  |
| XPDrna_F   | GGGGACAAGTTTGTACAAAAAAGCAGGCTTGACGGAGCTCAAGAAAGGT  |
| XPDrna_R   | GGGGACCACTTTGTACAAGAAAGCTGGGTACCTTTAGCGCCTTCCTAGC  |
| XPERnai_F  | GGGGACAAGTTTGTACAAAAAAGCAGGCTATGCACCAGGGTAGTTTTGC  |
| XPERnai_R  | GGGGACCACTTTGTACAAGAAAGCTGGGTTTCTAGAGTCGGCCAAGCAT  |
| XPFrna_F   | GGGGACAAGTTTGTACAAAAAAGCAGGCTGAATGGGAGCGATGGACTAA  |
| XPFrna_R   | GGGGACCACTTTGTACAAGAAAGCTGGGTCCACTAAACGAACGGCATT   |
| ERCC1rna_F | GGGGACAAGTTTGTACAAAAAAGCAGGCTTGTGTTGTGCTTCTTCTCCG  |
| ERCC1rna_R | GGGGACCACTTTGTACAAGAAAGCTGGGTTTCATAAATGCAGCGAAGTGC |
| XPGrna_F   | GGGGACAAGTTTGTACAAAAAAGCAGGCTACCTGGTGAAAGTGTGGAGG  |
| XPGrna_R   | GGGGACCACTTTGTACAAGAAAGCTGGGTAACCTCCCGAGTTCGTTTTT  |
| CSBrnai_F  | GGGGACAAGTTTGTACAAAAAAGCAGGCTACCGGAGAAATACGAACGTG  |
| CSBrnai_R  | GGGGACCACTTTGTACAAGAAAGCTGGGTCTGTTACTGCGCATCGAAAA  |
| XPCrnaq_F  | GAAGTCGCTGCAGCCAAGA                                |
| XPCrnaq_R  | GCGTCAGCGAAGTCATCAAG                               |
| XPEFrnaq_F | GAATTGATTTCCGTGACGTTTCT                            |
| XPERrnaq_R | CGGCGACCGCATTTC                                    |
| XPBzrnaq_F | TAACGTTAACATTGCGTTGAAGTCT                          |
| XPBzrnaq_R | GCGTCAACAGCAGCGATCT                                |
| XPBrnaq_F  | AGTTGGTGGAGGGCAATCC                                |
| XPBrnaq_R  | AGCAAGCGGTCCACAACAG                                |
| XPDrnaq_F  | GACTGACCAGCGTTGTGTGACTT                            |

|              |                         |
|--------------|-------------------------|
| XPDrnaq_R    | CGGGCGGAGATCAAAGC       |
| XPGrnaq_F    | CCAGCGCCGTCAACCA        |
| XPGrnaq_R    | AAGTCGTCGTTGAGCAGAATCA  |
| XPFrnaq_F    | TCCCGACTGGACCCCTTATC    |
| XPFrnaq_R    | GGGTTGACCTCCGGAACAG     |
| ERCC1rnaq_F  | CGGAACTGCCGGGTTTC       |
| ERCC1rnaq_R  | CGTTAAGTACGGCGTGAAGTCTT |
| CSBrnaq_F    | GAGCACTGCCGGTTGCTT      |
| CSBrnaq_R    | TGCCCTCGTCAAGAATAACA    |
| HIPB1rnaq_F  | ACGCTGCAAATTATGCTTTACG  |
| HIPB1rnaq_R  | GGCACGTCTATCTCCAAAGAAAA |
| MANB2rnaq_F  | CGGCTCGCTGTGGATCTT      |
| MANB2rnaq_R  | CCCAGTGGGCGTGTCAA       |
| TCPB3rnaq_F  | GACCTCGCGGCTCACTTC      |
| TCPB3rnaq_R  | CTTACGCAAACGGCGAATG     |
| HIP2B4rnaq_F | GCACAGGCGGGAAACG        |
| HIP2B4rnaq_R | ATCCCCATGTCGGCAGAA      |
| ACTA1rnaq_F  | CGGCTCGTGGGCTTTAAAG     |
| ACTA1rnaq_R  | ACGCCGCCGTAAGTTCTG      |
| DNATA3rnaq_F | CGTGAGGAGTTGCCACAGAA    |
| DNATA3rnaq_R | TACGGCACCCACTCCTGAA     |
| HIP3A4rnaq_F | GTTGAGCGAATGTGCATGCT    |
| HIP3A4rnaq_R | CGCGCCGAAGTGTAAGC       |
| HIP4A5rnaq_F | CGTTGAAGACCGCGCAGTA     |
| HIP4A5rnaq_R | GAGGCGCAGTTCAAGCATCT    |
| GPI8rnaq_F   | TCTGAACCCGCGCACTTC      |
| GPI8rnaq_R   | CCACTCACGGACTGCGTTT     |

All primer names contain the name of target gene (XPE refers to DDB). “rna” label is designed for primers used in production of RNAi constructs, while “rnaq” label is for all primers utilized in mRNA quantification analysis. “\_F” and “\_R” mean primer forward and reverse, respectively.



# T. brucei RAD23

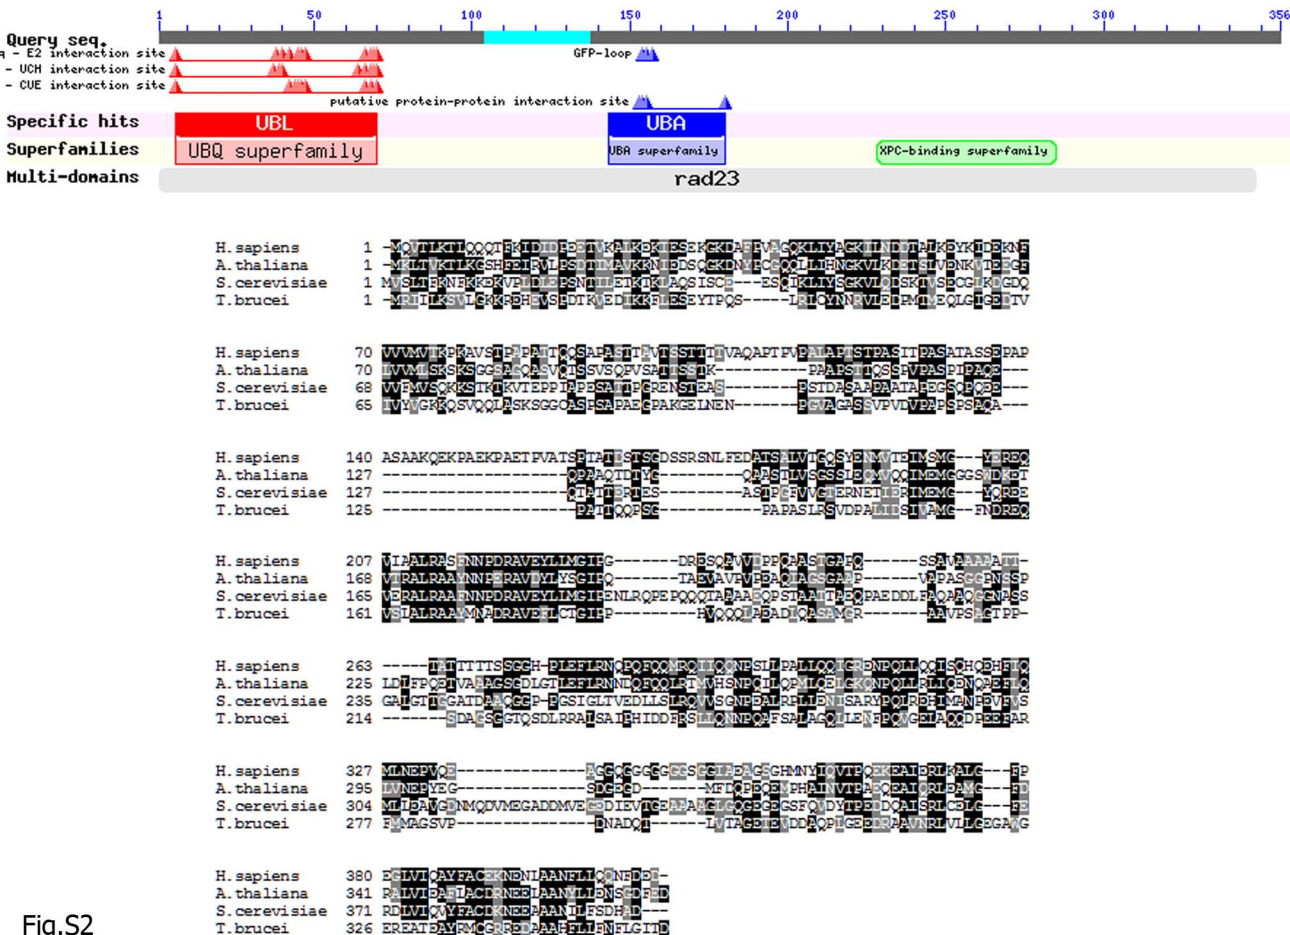

Fig.S2

## T. brucei DDB

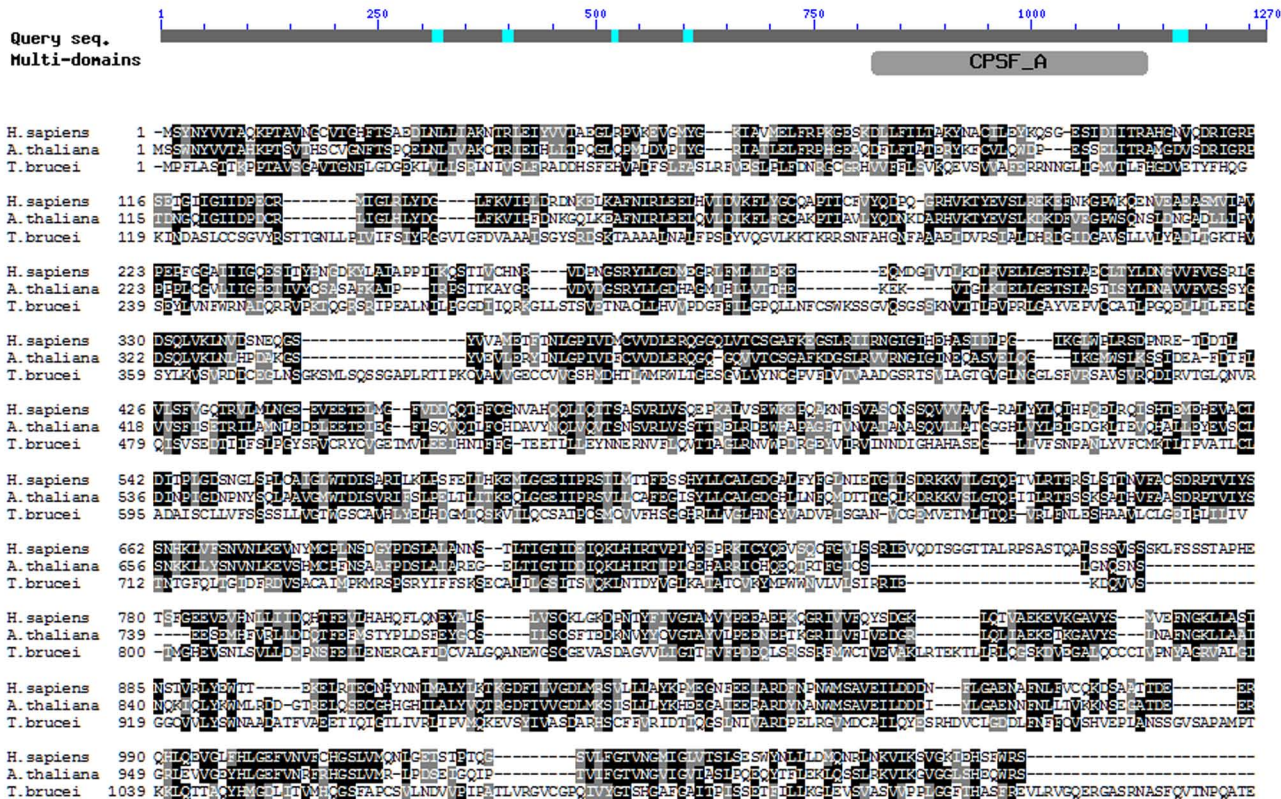





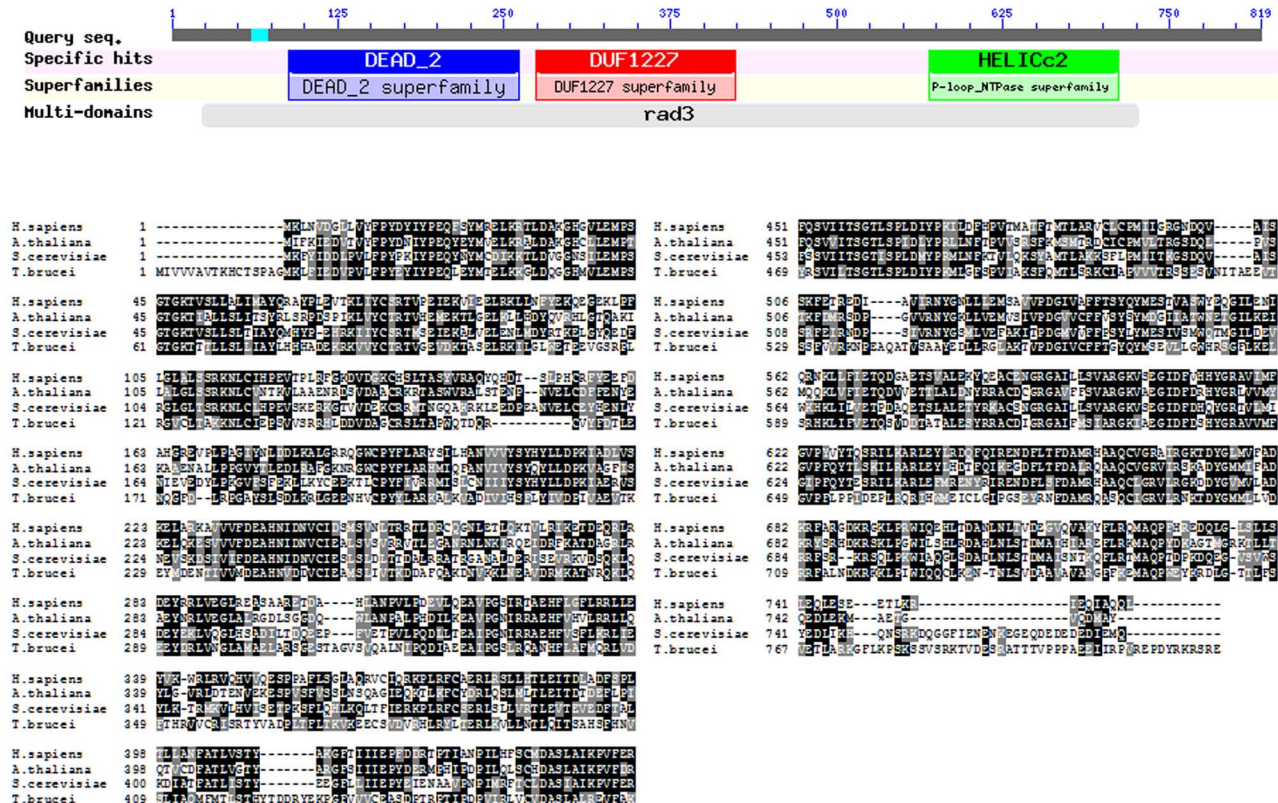

## *T. brucei* XPB

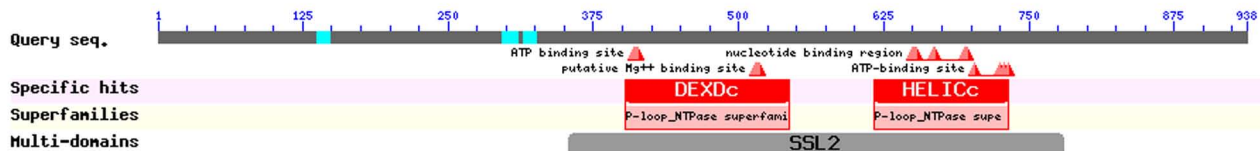

## *T. brucei* XPBz

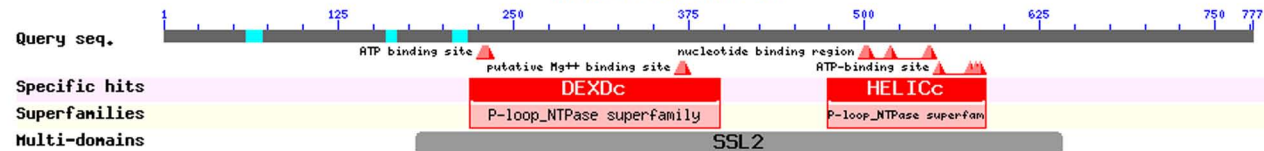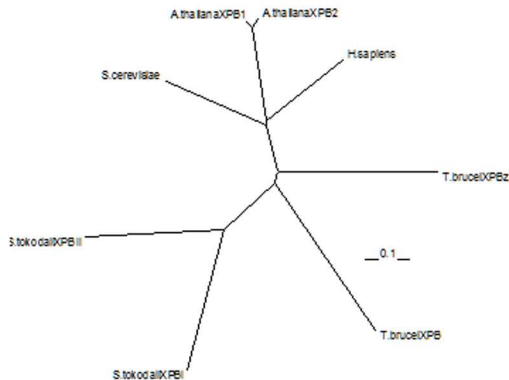

Fig.S6

# T. brucei XPG

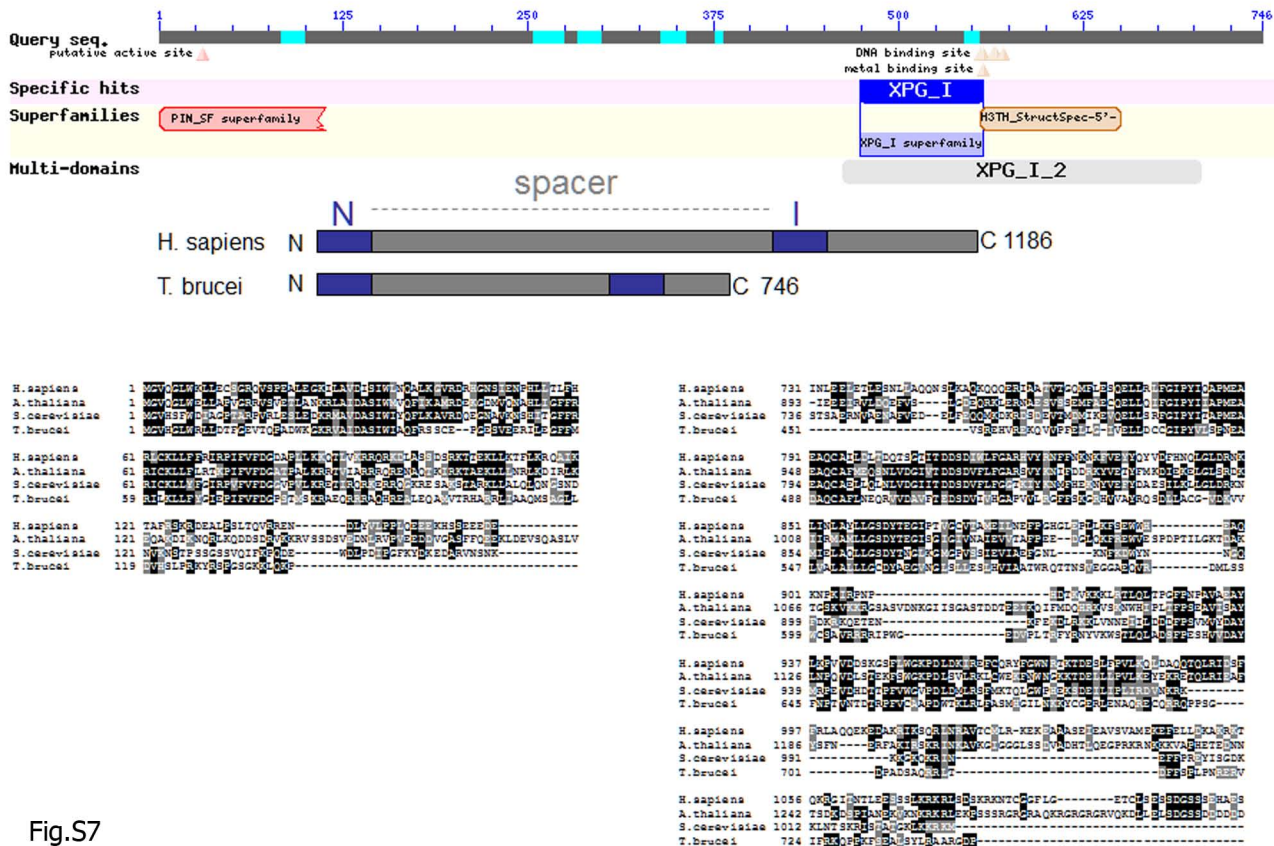

Fig.S7

# T. brucei XPF

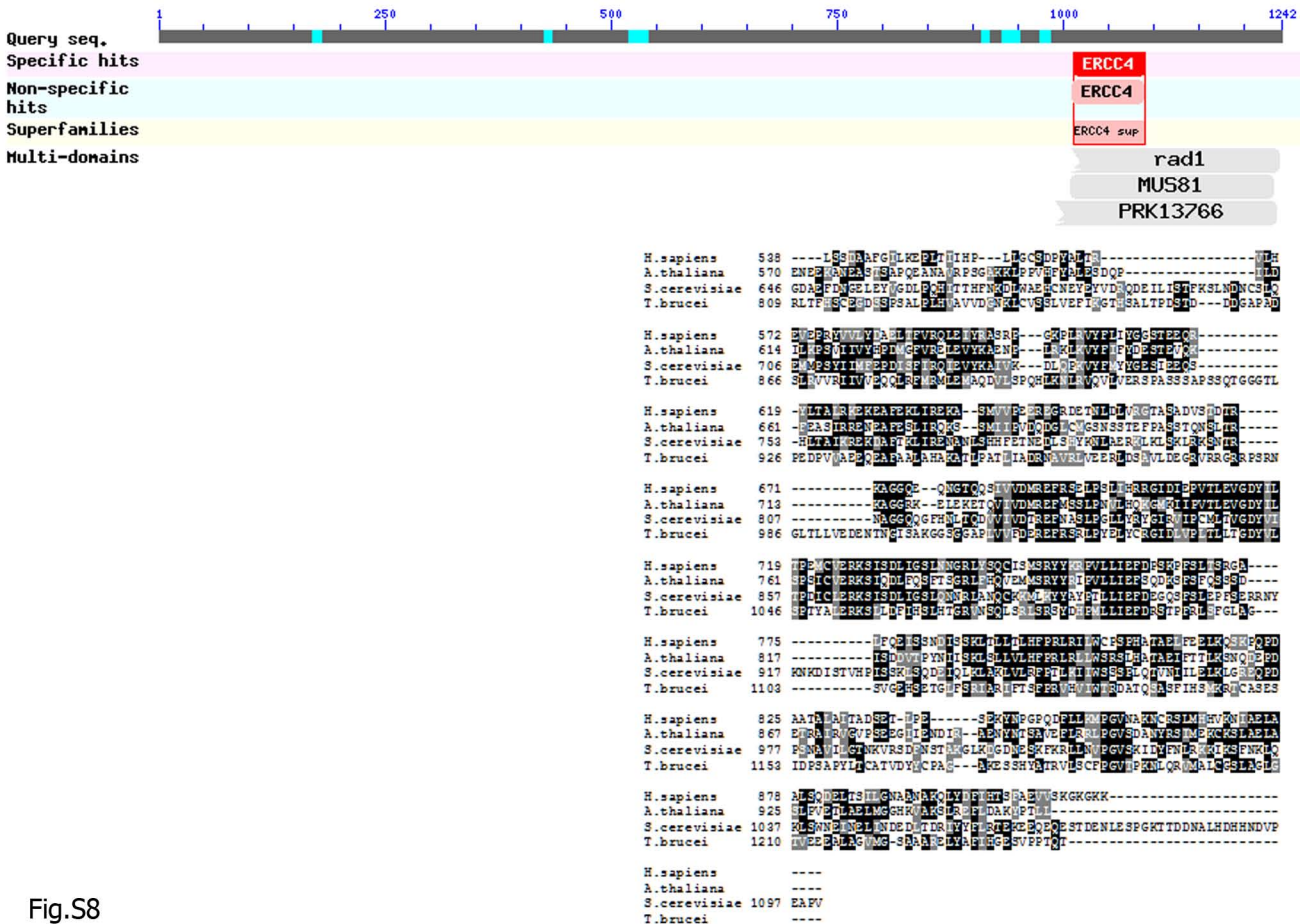

Fig.S8

*T. brucei* ERCC1

|              |     |                                                                                                                                                                                                                                                                                                                                                                                                                                                                     |
|--------------|-----|---------------------------------------------------------------------------------------------------------------------------------------------------------------------------------------------------------------------------------------------------------------------------------------------------------------------------------------------------------------------------------------------------------------------------------------------------------------------|
| H.sapiens    | 1   | ----MDPEKDKESVYEQPSGEPARKKFFVIFID-----EDEVPPGVAKPLFRSTQSL                                                                                                                                                                                                                                                                                                                                                                                                           |
| A.thaliana   | 1   | MANEDDDGEGKSRSLHQIARKPKTQIVIGVPSYQEVLESSQTKSTPPSLEKPSQSFSQAF                                                                                                                                                                                                                                                                                                                                                                                                        |
| S.cerevisiae | 1   | -----MNNIDETSEESILAGVA-----KLRKEKSGADTTGSQSL                                                                                                                                                                                                                                                                                                                                                                                                                        |
| T.brucei     | 1   | -----MPPLPRGVVVKVVGALRGDNIIRIMQRHR-----YVIEEADLPIYDFLCGGTCV                                                                                                                                                                                                                                                                                                                                                                                                         |
| H.sapiens    | 47  | PTVDTIS-AGAAPQTYAEYALISQPIEGAGATCPTGSEPLAGETPNQALKPGAK-----                                                                                                                                                                                                                                                                                                                                                                                                         |
| A.thaliana   | 61  | A <del>FV</del> KSSD <del>VY</del> SP <del>PP</del> SSAAASSSQPSGASQVPHSSSQTHQTDGASSSSTPVATG <del>SV</del> PSNTT                                                                                                                                                                                                                                                                                                                                                     |
| S.cerevisiae | 35  | EIDASKLQ <del>Q</del> Q <del>E</del> PQTSRRINSNQVINA <del>F</del> NQ <del>Q</del> KPEEWTD <del>S</del> KATDDY <del>N</del> RKR <del>P</del> FRS-----T                                                                                                                                                                                                                                                                                                               |
| T.brucei     | 49  | V <del>F</del> VD <del>D</del> A <del>D</del> DL <del>S</del> DAARRTKV <del>S</del> QQLS <del>V</del> LKTHTGASWRCV <del>V</del> LL <del>R</del> V <del>V</del> SEEV <del>R</del> PDIL-----                                                                                                                                                                                                                                                                          |
| H.sapiens    | 98  | --S <del>N</del> SI <del>I</del> V <del>S</del> FR <del>O</del> GNP <del>V</del> LK <del>F</del> V <del>R</del> N <del>V</del> PE <del>E</del> FG-----D <del>V</del> I <del>P</del> DY <del>V</del> L <del>G</del> Q <del>S</del> T <del>C</del> A <del>L</del> F <del>L</del> S <del>L</del> R <del>Y</del> H <del>N</del> L <del>H</del> P                                                                                                                        |
| A.thaliana   | 121 | Q <del>N</del> R <del>N</del> A <del>I</del> L <del>V</del> S <del>H</del> R <del>O</del> K <del>G</del> N <del>P</del> IL <del>K</del> H <del>I</del> R <del>N</del> V <del>K</del> W <del>V</del> FS-----D <del>I</del> I <del>P</del> DY <del>V</del> L <del>G</del> Q <del>N</del> S <del>C</del> A <del>L</del> Y <del>L</del> S <del>L</del> R <del>Y</del> H <del>L</del> L <del>H</del> P                                                                   |
| S.cerevisiae | 88  | R <del>P</del> E <del>K</del> T <del>V</del> L <del>V</del> N <del>T</del> Q <del>K</del> EN <del>P</del> IL <del>N</del> H <del>L</del> K <del>S</del> T <del>N</del> R <del>V</del> VS <del>S</del> TGIN <del>M</del> I <del>Y</del> D <del>Y</del> L <del>V</del> R <del>G</del> R <del>S</del> V <del>L</del> F <del>L</del> T <del>L</del> T <del>Y</del> H <del>K</del> L <del>Y</del> V                                                                      |
| T.brucei     | 101 | --E <del>W</del> L <del>N</del> L <del>H</del> C <del>S</del> V <del>E</del> Q <del>G</del> C <del>G</del> V <del>L</del> F <del>W</del> T <del>D</del> E <del>E</del> C <del>A</del> A <del>Y</del> -----L <del>E</del> <del>G</del> L <del>S</del> D <del>S</del> N <del>V</del> A <del>T</del> A <del>D</del> Y <del>C</del> V <del>G</del> V <del>R</del> D <del>S</del> T <del>P</del> M                                                                       |
| H.sapiens    | 151 | D <del>Y</del> L <del>H</del> G <del>R</del> L <del>O</del> S <del>L</del> G <del>K</del> N <del>E</del> A <del>L</del> R <del>V</del> L <del>L</del> V <del>Q</del> V <del>D</del> V <del>K</del> D <del>P</del> Q <del>A</del> L <del>K</del> E <del>L</del> A <del>K</del> M <del>C</del> T <del>L</del> A <del>D</del> C <del>T</del> L <del>I</del> L <del>A</del> W <del>S</del> P <del>E</del> E <del>A</del> G <del>R</del> Y <del>L</del> E                |
| A.thaliana   | 176 | D <del>Y</del> L <del>Y</del> F <del>R</del> I <del>R</del> E <del>L</del> Q <del>K</del> N <del>E</del> K <del>L</del> S <del>V</del> V <del>L</del> C <del>H</del> V <del>D</del> V <del>E</del> D <del>I</del> V <del>K</del> P <del>L</del> L <del>E</del> V <del>T</del> K <del>T</del> A <del>L</del> L <del>H</del> D <del>C</del> T <del>L</del> L <del>C</del> A <del>W</del> S <del>M</del> T <del>E</del> C <del>A</del> R <del>Y</del> L <del>E</del>   |
| S.cerevisiae | 148 | D <del>Y</del> L <del>S</del> R <del>R</del> M <del>O</del> P <del>L</del> S <del>R</del> N <del>E</del> N <del>N</del> -I <del>L</del> L <del>F</del> I <del>V</del> D <del>D</del> N <del>N</del> S <del>E</del> D <del>T</del> L <del>N</del> D <del>I</del> T <del>K</del> L <del>C</del> M <del>F</del> N <del>G</del> F <del>T</del> L <del>L</del> L <del>A</del> F <del>N</del> F <del>E</del> Q <del>A</del> A <del>K</del> Y <del>T</del> E               |
| T.brucei     | 153 | Q <del>L</del> I <del>D</del> A <del>L</del> T <del>Q</del> T <del>P</del> Q <del>L</del> M <del>T</del> R <del>N</del> D <del>V</del> V <del>R</del> A <del>V</del> N <del>S</del> F <del>G</del> S <del>V</del> A <del>G</del> L <del>L</del> I <del>T</del> A <del>T</del> ----AE <del>Q</del> L <del>T</del> E <del>L</del> P <del>G</del> F <del>A</del> Q <del>K</del> K <del>A</del> G <del>R</del> L <del>H</del> A                                         |
| H.sapiens    | 211 | T <del>Y</del> K <del>A</del> Y <del>E</del> Q <del>K</del> P <del>A</del> D <del>L</del> L <del>M</del> E <del>K</del> L <del>E</del> Q <del>D</del> F <del>V</del> S <del>R</del> V <del>T</del> E <del>C</del> L <del>T</del> T <del>V</del> K <del>S</del> V <del>N</del> K <del>T</del> D <del>S</del> Q <del>T</del> I <del>L</del> L <del>T</del> T <del>F</del> G <del>S</del> L <del>E</del> Q <del>L</del> I <del>A</del> A <del>S</del> R <del>E</del> D |
| A.thaliana   | 236 | T <del>L</del> K <del>V</del> Y <del>E</del> N <del>K</del> P <del>A</del> D <del>L</del> L <del>Q</del> Q <del>M</del> D <del>T</del> D <del>Y</del> L <del>S</del> R <del>L</del> N <del>H</del> S <del>L</del> T <del>S</del> I <del>R</del> H <del>V</del> N <del>K</del> S <del>D</del> V <del>V</del> T <del>L</del> G <del>S</del> T <del>F</del> G <del>S</del> L <del>A</del> H <del>I</del> I <del>D</del> A <del>S</del> M <del>E</del> D                |
| S.cerevisiae | 207 | Y <del>L</del> N <del>L</del> -----                                                                                                                                                                                                                                                                                                                                                                                                                                 |
| T.brucei     | 209 | V <del>L</del> N <del>A</del> P <del>F</del> N <del>T</del> S <del>R</del> C <del>L</del> V <del>A</del> V <del>L</del> Q <del>R</del> D-Q <del>D</del> E <del>S</del> N <del>D</del> E <del>S</del> S <del>E</del> R <del>R</del> P <del>A</del> C <del>E</del> T <del>M</del> K <del>Q</del> A <del>L</del> R <del>C</del> I <del>Y</del> D <del>R</del> E <del>D</del> E <del>D</del> V <del>Q</del> E <del>G</del> G <del>Q</del> -                             |
| H.sapiens    | 271 | L <del>A</del> L <del>C</del> P <del>G</del> L <del>G</del> P <del>Q</del> K <del>A</del> R <del>R</del> L <del>F</del> D <del>V</del> L <del>H</del> E <del>P</del> L <del>K</del> V <del>P</del> -----                                                                                                                                                                                                                                                            |
| A.thaliana   | 296 | L <del>A</del> R <del>C</del> P <del>G</del> L <del>G</del> E <del>R</del> K <del>V</del> R <del>L</del> Y <del>D</del> T <del>F</del> H <del>E</del> P <del>K</del> R <del>A</del> T <del>S</del> S <del>Y</del> P <del>S</del> V <del>V</del> E <del>P</del> P <del>I</del> P <del>E</del> A <del>P</del> V <del>E</del> K <del>D</del> V <del>N</del> S <del>E</del> E <del>P</del> V <del>E</del> E <del>D</del> E <del>D</del> F <del>V</del>                  |
| S.cerevisiae |     | -----                                                                                                                                                                                                                                                                                                                                                                                                                                                               |
| T.brucei     |     | -----                                                                                                                                                                                                                                                                                                                                                                                                                                                               |
| H.sapiens    |     | -----                                                                                                                                                                                                                                                                                                                                                                                                                                                               |
| A.thaliana   | 356 | E <del>D</del> S <del>R</del> K <del>R</del> K <del>K</del> K <del>E</del> P <del>E</del> P <del>E</del> K <del>T</del> V <del>K</del> T <del>A</del> L <del>S</del> A <del>V</del> F <del>A</del> R <del>Y</del> S <del>D</del> R <del>L</del> S <del>K</del> K <del>K</del> E <del>K</del> Q <del>K</del> E <del>K</del> D <del>T</del> T <del>T</del> A <del>S</del> D <del>A</del> E <del>T</del> H <del>Q</del> N                                              |
| S.cerevisiae |     | -----                                                                                                                                                                                                                                                                                                                                                                                                                                                               |
| T.brucei     |     | -----                                                                                                                                                                                                                                                                                                                                                                                                                                                               |

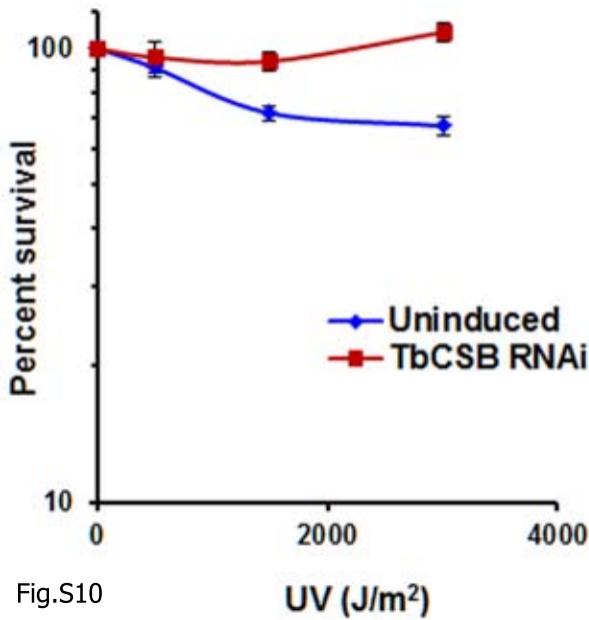

Fig.S10
